# Supplementary material for: Telerehabilitation programmes for patients with cancer and survivors: a protocol for a systematic review
Source: HighWire-hosted journal article supplement (doi:10.1136/bmjopen-2021-058981), 2022-04-01
Supplement: bmjopen-2021-058981supp001_data_supplement.pdf [file bmjopen-2021-058981supp001_data_supplement.pdf]

## Appendix 1

Search Strategy Example: MEDLINE (via Ovid) search

### Terms specific to Telerehabilitation

#1 exp Telemedicine/

#2 exp Telerehabilitation/

#3 (ehealth or e-health or mhealth or m-health or telehealth or tele-health or mobile health or telemetry or telerehab\* or tele-rehab\* or remote rehabilitation\* or virtual rehabilitation\* or telehomecare or tele-homecare or telecoaching or tele-coaching or telecommunication\* or tele-communication\* or teleconference\* or tele-conference\* or videoconferenc\* or video-conferenc\* or teleconsultation\* or tele-consultation\* or videoconsultation or video-consultation or telecare or tele-care).ab,ti.

#4 (telephone or smartphone or phone or mobile or video or audio or radio or internet or web\* or network or on-line or computer\* or sensor\* or wearable or modem or email or message or media or tablet or handheld device or personal digital assistant or portable data terminal or podcast or application or App or Apps or software or virtual reality\* or game\*).ab,ti.

#5 exp Rehabilitation/

#6 #1 or #2 or #3 or (#4 and #5)

### Terms specific to cancer

#7 exp Neoplasms/

#8 exp Carcinoma/

#9 (cancer\* or tumor\* or tumour\* or neoplas\* or malignanc\* or onco\* or carcinoma\*).ab,ti.

#10 #7 or #8 or #9

### Terms for identifying randomized controlled trials

#11 randomized controlled trial.pt.

#12 controlled clinical trial.pt.

#13 (random\* or placebo or sham or trial or groups). ab,ti.

#14 #11 or #12 or #13

**Combination of terms to identify randomized controlled trials of telerehabilitation programs for cancer patients and survivors**

#6 and #10 and #14
